# Supplementary material
Source: PubMed Central journal article supplement (PMC5866247)
Supplement: NIHMS947547-supplement-supplement_1.pdf [file NIHMS947547-supplement-supplement_1.pdf]

**Supplemental figure titles and legends:**

**Figure S1. (Related to Figure 1) PER in a subset of BBB regulates circadian xenobiotic permeability, but not circadian behavior.** a) RHB does not vary in bodies across the day. WT flies were anesthetized with CO<sub>2</sub> and injected with RHB. After 60 mins of recovery, fly bodies were homogenized in PBS. The supernatant was collected and measured using a fluorescence reader at Ex540/Em595. Individual data points and means are shown. n=14-21 per time point from 3 experiments (WT). b) Daunorubicin also shows a nighttime increase in BBB permeability. WT Iso31 flies were injected with daunorubicin. After 60 mins of recovery, fly brains were dissected and dissociated in groups of 5. The corresponding bodies were homogenized and the supernatant was measured using a fluorescence reader at Ex490/Em520. n=5-6 per time point, pooled from 2 experiments. c) PG glia greatly outnumber SPG in the BBB. Whole brains of SPG-GAL4>UAS-nGFP or PG-GAL4>UAS-nGFP were imaged using a confocal microscope. Images of representative Z-stacks are shown. d) PER localizes to PG, but not SPG. Brains from SPG-GAL4>UAS-nGFP or PG-GAL4>UAS-nGFP were stained with anti-PER antibody at ZT2. Representative images of brain surface are shown. e) Loss of the clock in the BBB does not affect behavioral rhythms. Iso31 or PG-GAL4>UAS-dnCyc flies were singly housed in glass tubes within *Drosophila* activity monitors for 3 days in 12:12 LD and 5 days in DD. Representative actograms are shown where black lines represent the activity of a fly crossing an infrared beam within the tube. n=16. (f-g) RHB permeability in GAL4 controls. (f) PG-GAL4 and (g) SPG-GAL4 were injected with RHB under CO<sub>2</sub> anesthesia and assessed by Ex540/Em595 fluorescence after 60 mins. Means  $\pm$  SEM of the ratio of brain:body fluorescence are depicted. n=17-29, pooled from 4 experiments. pCycle indicates a presence of rhythm using JTK cycle analysis.

**Figure S2. (Related to Figure 2) Neither influx of RHB nor efflux transporter expression is rhythmic in the fly brain.** a) Brains from microwaved and live flies were dissected and incubated with RHB. Dye was washed off and immediately imaged with a confocal microscope. Initial fluorescence is shown as means  $\pm$  SEM. n=3 from one representative experiment (left panel). Initial fluorescence from

live brains assayed at ZT4-8 or ZT12-16 is shown as means  $\pm$  SEM. n=6-7 pooled from 3 independent experiments (right panel). b) Expression of Mdr65 and Mdr49 mRNA in brains was determined by qPCR and normalized to actin. c) Brains collected at different circadian times were incubated with c219 anti-pgp antibody and imaged with a confocal microscope. Representative images are shown; n=8 from 2 independent experiments.

**Figure S3. Related to Figure 3. Knock-down of *Inx1* in glia affects RHB permeability.** a) Limited numbers of BBB glia can be obtained from *Drosophila* heads. Heads from *repo-GAL4>UAS-mCD8GFP* (glia) flies, or brains from *SPG-GAL4>UAS-mCD8GFP* (SPG) or *PG-GAL4>UAS-mCD8GFP* (PG) flies were dissociated and sorted by FACS. Representative sorting gates and percentage of live cells are shown. b) Expression of *Inx1* and *Inx2* mRNA. RNA was extracted from sorted total brain cells, sorted glia, sorted SPG, and sorted PG and examined for *Inx1* and *Inx2* enrichment. n=1 (sorted brain), n=3 (glia, SPG, PG). Means  $\pm$  S.E.M. are shown. c) Effect of RNAi knockdown on *Inx1* expression. *Repo-GAL4, UAS-Inx1<sup>RNAi</sup>* and *Repo>Inx1<sup>RNAi</sup>* flies were analyzed for *Inx1* mRNA levels by qPCR. d) Permeability rhythm is affected by knockdown of *Inx1* in PG cells. *PG-GAL4>UAS-Inx1<sup>RNAi</sup>* (TRiP) flies were injected with RHB under at different time points and the levels of RHB in individual fly brains and bodies were measured using a fluorescence reader at Ex540/Em595 after 1 hr. The ratio of RHB in the brain compared to bodies is shown. n=10-22, pooled from 3 independent experiments. pCycle indicates a presence of rhythm using JTK cycle analysis. (e-f) Innexin manipulations do not affect septate junction localization or function. e) Brains from wild-type, *PG-GAL4>UAS-Inx1<sup>RNAi</sup>*, *PG-GAL4>UAS-dnInx2*, and *SPG-GAL4>UAS-dnInx2* were incubated with anti-DLG1 antibody to localize septate junctions. Representative images from the posterior surface are shown. f) Iso31 wild-type, *PG-GAL4>UAS-Inx1<sup>RNAi</sup>*, *PG-GAL4>UAS-dnInx2*, *SPG-GAL4>UAS-dnInx2*, and *NrxIV<sup>mut</sup>* flies were injected with fluorescently labeled 10kd Dextran (either conjugated with TMRD (red) or AF647 (white)). Although TMRD gave a better signal, it could not be used with dnINX2, which is tagged with RFP. 3/16 of the *NrxIV<sup>mut</sup>* flies showed a leaky phenotype. All other lines had no leaky brains. n=16-20. Representative images are shown.

**Figure S4. (Related to Figure 4) Intracellular magnesium and calcium concentrations in the BBB.**

a)  $[Mg^{2+}]_i$  levels in *Drosophila* brains were measured by flow cytometry. WT brains were dissected in AHL, incubated with DMSO, Magfura2, Magfura2 + ionophore A23187 at room temperature, washed with AHL, and dissociated. Cells were then analyzed by flow cytometer. Fluorescence intensity of all cells is shown as overlaid histograms from a representative experiment. b) Brains from 9-137-*GAL4>UAS-mCD8GFP*  $[Mg^{2+}]_i$  dissected at ZT2, ZT8, ZT14, or ZT20, were incubated with Magfura2-AM and measured by flow cytometry. The percent change in mean fluorescence intensity (MFI) of Magfura2 within the GFP+ population is shown as means  $\pm$  SEM.  $n = 4$  from 4 independent experiments. pCycle indicates a presence of rhythm using JTK cycle analysis. c) Brains from 9-137-*GAL4>CaLexA* flies were dissected at ZT2, ZT8, ZT14, or ZT20 and imaged with a confocal microscope. Means  $\pm$  SEM of fluorescence are shown.  $n=11-14$ , pooled from 2 experiments. pCycle indicates a presence of rhythm using JTK cycle analysis. d) Cal630-AM was used to measure  $[Ca^{2+}]_i$  in SPG-*GAL4>UAS-mCD8RFP* brains dissected at ZT2, ZT8, ZT14, or ZT20. Brains were incubated with Cal630-AM, washed, dissociated, and analyzed by flow cytometry. The percent change in MFI of Cal630 within the RFP+ population is shown as means  $\pm$  SEM.  $n = 6$  from 4 experiments.

**Figure S5. (Related to Figure 5) *Eas* mutants exhibit comparable intake of phenytoin throughout the day.** Flies were starved for 24 hrs and given agar-sucrose with Blue 1 and phenytoin for 2 hrs throughout the day. Flies were homogenized in PBS. The supernatant was collected and absorption measured at 260nm. Shown are individual data points  $\pm$  S.D.  $n=12$  from 2 independent experiments.

619 **STAR Methods:**

620 **Contact for Reagent and Resource Sharing**

621 Further information and requests for resources and reagents should be directed to and will be fulfilled  
622 by the Lead Contact, Amita Sehgal (amita@pennmedicine.upenn.edu).

623 **Experimental Model and Subject Details**

624 *Drosophila* lines

625 Fly stocks were raised and maintained on cornmeal-molasses medium at 25°C. The *w<sup>1118</sup>* iso31 strain  
626 was used as wild type. When tested as controls, UAS and GAL4 fly lines were tested as heterozygotes  
627 after crossing to iso31. 5-14 day old adult female flies were used for experiments; the age range is  
628 further specified for each method.

629

630 **Method details**

631 *Permeability in fly brains*

632 5-7 day old adult female flies were entrained to 12:12 LD cycles. RHB and daunorubicin delivery  
633 methods are similar to those previously described (Bainton et al., 2005). Briefly, a microinjection needle  
634 delivered intrahumoral 2.5 mg/mL RHB or 9 mg/ml daunorubicin in PBS between the posterior  
635 abdominal wall body segments of CO<sub>2</sub> anesthetized flies. Capillary action or positive pressure was  
636 applied to the needle under direct visualization over 1-2 secs to deliver an average volume of 50 nL per  
637 injection. Flies were given 1 hr after injection to rest and efflux the RHB at 25°C. Brains from the f lies  
638 were rapidly dissected in 1X PBS and washed with PBS before being placed in 50 µL 0.1% SDS.  
639 Brains were dissociated over >30 mins and the dye from brain samples was measured at  
640 excitation/emission: 540/590 using a Victor 3V (Perkin Elmer) plate reader. Bodies from the  
641 corresponding flies were homogenized, spun down and measured at the same wavelengths. Uninjected  
642 flies were used to adjust for background and the ratios of brain to body levels were calculated for  
643 individual flies for RHB and from 5 flies pooled for daunorubicin. Animals with less than 0.1 mg RHB

644 detected in the body were excluded from analysis due to increased variability of the brain:body ratio at  
645 brain RHB detection threshold. Amount of RHB was calculated using a standard curve.

646

647 Live imaging of fly brains RHB efflux

648 Iso31 female flies were entrained to 12:12 LD cycles. Brains were carefully dissected in minimal  
649 hemolymph solution HL3.1 (Feng et al., 2004) (70mM NaCl, 5mM KCl, 4 MgCl<sub>2</sub>mM, 10mM NaHCO<sub>3</sub>,  
650 5mM trehalose, 115 sucrose, and 5mM HEPES, pH 7.4) with forceps with care to minimize damage to  
651 the surface of the brain. Brains were incubated in RHB (125 µg/mL) with or without verapamil (100  
652 µg/mL) for 2 mins and washed with HL3.1 media to image immediately. To determine the loss of  
653 fluorescence due to diffusion and photobleaching during imaging, flies were microwaved for 1 min prior  
654 to brain dissection. Brains were imaged for 10 mins using a Leica SP5 confocal microscope. FIJI  
655 software was used for analysis.

656

657 Immunofluorescence microscopy

658 Fly brains were dissected in cold PBS and fixed in 4% paraformaldehyde (PFA) for 10-20 min at room  
659 temperature. Brains were rinsed 3 × 10 min with PBS with 0.1% Triton-X (PBST), blocked for 30–  
660 60 min in 5% normal donkey serum or goat serum in PBST (NDST), and incubated overnight at 4°C in  
661 primary antibody diluted in NDST. Brains were then rinsed 4 × 10 min in PBST, incubated 2 hrs in  
662 secondary antibody diluted in NDST, rinsed 4 × 10 min in PBST, and mounted with Vectashield.  
663 Primary antibodies included guinea pig anti-PER UP1140 (1:1000), mouse anti-PGP C219 (10 µg/ml),  
664 and guinea pig anti-INOX2 (1:1000), and guinea pig mouse anti-DLG1 (1:50). Secondary antibodies  
665 included goat anti-guinea pig Cy5 (Rockland), goat anti-guinea pig anti-AF555 (Jackson Immuno),  
666 donkey anti-mouse AF647 (Jackson Immuno). Brains were imaged using a Leica SP5 confocal  
667 microscope. FIJI software was used for analysis.

668

669 For dextran-dye penetration experiments, we injected fluorescence tagged 10000 molecular weight  
670 fixable dextran (25 mg/ml TMRD or 10 mg/ml AF647) into fly hemolymph under CO<sub>2</sub> anesthesia as  
671 previously described (Pinsonneault et al., 2011). 16-24 hours after injection, flies were anesthetized  
672 using CO<sub>2</sub> and decapitated. The proboscis was quickly removed from the head and the head was  
673 immediately submerged in 4% PFA for 15 min. Following fixation, the brain was dissected and washed  
674 for < 4 × 10 min in PBST and mounted in Vectashield. Brains were imaged using a Leica SP5 confocal  
675 microscope.

676

#### 677 Rest:activity rhythms assays

678 Locomotor activity assays were performed with the *Drosophila* Activity Monitoring System (Trikinetics)  
679 as described previously (Williams et al., 2001). 5-7-day-old female flies were entrained to a 12:12 LD  
680 cycle for 3 days then transferred to constant darkness for 5 days. Flies were maintained at 25°C  
681 throughout the assay.

682

#### 683 FACS sorting glial populations

684 Brains were dissected in ice cold HL3.1 and were maintained on ice except during dissociation.  
685 Collagenase A and DNase I were added to final concentrations of 2 mg/mL and 20 µl/mL, respectively.  
686 Brains were dissociated at 37°C using a shaker at 250 rpm for 20 mins pausing at 10 mins to pipette  
687 vigorously. Dissociated tissue was filtered through 100 µm cell strainer and sorted using a 100 µm  
688 nozzle on a BD FACSAria (BD Biosciences). Dead cells were excluded with 4,6-diamidino-2-  
689 phenylindole (DAPI). Doublets were excluded using FSC-H by FSC-W and SSC-H by SSC-W  
690 parameters. GFP<sup>+</sup> cells gates were set using according to GFP<sup>-</sup> brain tissue. Data were analyzed using  
691 FlowJo version 10.3 (Tree Star).

692

#### 693 Quantitative PCR

694 Brains were dissected in cold PBS and immediately lysed. RNA was extracted using RNeasy mini kit  
695 and reverse transcribed to cDNA using random hexamers and Superscript II (Invitrogen). Real-time  
696 polymerase chain reaction (PCR) was performed using Sybr Green PCR Master Mix (Applied  
697 Biosystems) with the oligonucleotides described in Table 2. Assays were run on ViiA7 Real-Time PCR  
698 system (Applied Biosystems). Relative gene expression was calculated using the  $\Delta\Delta C_t$  method  
699 normalizing to actin.

700

701 Flow cytometric assay for intracellular magnesium and calcium levels

702 Brains from entrained adult female flies (5-7 days) with fluorescently-labeled PG or SPG were  
703 dissected in adult hemolymph-like saline (AHL; 108mM NaCl, 5mM KCl, 2mM  $\text{CaCl}_2$ , 8.2mM  $\text{MgCl}_2$ ,  
704 4mM  $\text{NaHCO}_3$ , 1mM  $\text{NaH}_2\text{PO}_4\text{-H}_2\text{O}$ , 5mM trehalose, 10mM sucrose, 5mM HEPES; pH 7.5) on ice.  
705 Brains were brought to room temperature (RT) for 10 mins and incubated with 5  $\mu\text{M}$  Magfura2-AM and  
706 5  $\mu\text{M}$  Cal630-AM for 20 mins at RT. Brains were washed with RT AHL for 3 x 5 mins. Then  
707 Collagenase IV and DNase I were added to final concentrations of 2 mg/mL and 20 units, respectively  
708 and brains were dissociated at 37°C with 250 rpm shaking for 15 mins. Dissociated tissue was filtered  
709 through 100  $\mu\text{m}$  cell strainer and washed with FACS buffer (PBS with 1% w/v bovine serum albumin  
710 and 0.1% w/v sodium azide). Cells were analyzed on BD FACSCanto II (BD Biosciences). Doublets  
711 were excluded using FSC-H by FSC-W and SSC-H by SSC-W parameters. RFP<sup>+</sup> cells gates were set  
712 according to RFP<sup>-</sup> brain tissue. Data were analyzed using FlowJo version 10.3.

713

714 Seizure recovery assay

715 7-14 day old adult female *eas*<sup>PC80</sup> flies were starved for 24 hrs to allow for maximum drug dosing. Flies  
716 were given 5% sucrose and 1.5% agar with or without 0.6 mg/mL phenytoin a previously described  
717 dose to improve recovery from seizure (Reynolds et al., 2004). Flies were tested in 2 vials (1 control  
718 and 1 phenytoin), each containing 15 flies. Mechanical shock was delivered by vortexing flies at high  
719 speed for 5 secs. The assays were video recorded and the number of flies seizing was recorded at 15

720 sec intervals until the entire population had recovered. Recovery was defined as standing and was  
721 analyzed by a researcher blinded to the drug condition. Mean recovery time was calculated as the  
722 average time it took any individual fly to recover in a population. Flies that never seized were calculated  
723 as 0 secs for recovery time.

724  
725 The blue dye feeding assay was performed as previously described (Deshpande et al., 2014). Briefly,  
726 after 24 hrs of starvation, flies were given food with 2% w/v FD&C Blue No. 1 for 2 hrs. Individual flies  
727 were homogenized and the absorbance at 620 nm was measured with a Victor 3V (Perkin Elmer) plate  
728 reader. The amount of food eaten was calculated by using a standard curve.

### 729 730 **Quantification and Statistical Analysis**

731 The statistical details of experiments can be found in the figure legends. Circadian statistical analysis  
732 was performed in R using JTK\_CYCLEv3.1. ANOVA and post-hoc Tukey tests were performed with  
733 GraphPad Prism. Student's T-tests were performed with Excel. Sample sizes were determined with  
734 powerandsamplesize.com.
